# Supplementary material for: Nanoscale partitioning of paclitaxel in hybrid lipid–polymer membranes
Source: Royal Society of Chemistry journal article supplement (doi:10.1039/c8an00838h), 2018-01-01
Supplement: c8an00838h1.pdf [file c8an00838h1.pdf]

Supporting information for:

Nanoscale partitioning of Paclitaxel in Hybrid Lipid-  
Polymer Membranes

*Mohit Tuteja,<sup>† a, b</sup> Minjee Kang,<sup>†, c</sup> Cecilia Leal,<sup>\*, c</sup> Andrea Centrone<sup>\*, a</sup>*

<sup>a</sup> Center for Nanoscale Science and Technology, National Institute of Standards and Technology,  
Gaithersburg, MD 20899, USA

<sup>b</sup> Maryland Nanocenter, University of Maryland at College Park, MD 20742, USA

<sup>c</sup> Department of Materials Science and Engineering, University of Illinois at Urbana-Champaign,  
IL 61801, USA

<sup>†</sup> Contributed equally.

\*Email: (C. L.) [cecilial@illinois.edu](mailto:cecilial@illinois.edu), (A. C.) [andrea.centrone@nist.gov](mailto:andrea.centrone@nist.gov)

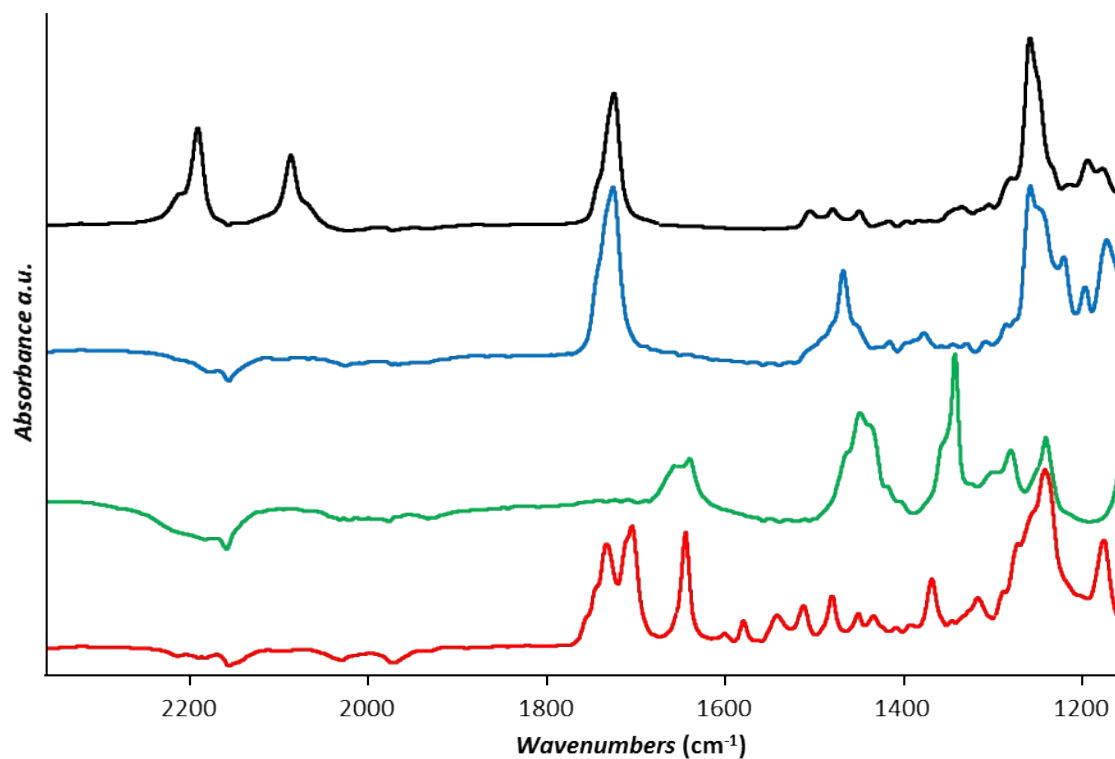

**Fig. S1** FTIR spectra of paclitaxel (red), PBD-b-PEO (green), DPPC (blue) and d-DPPC (black). The spectra intensity has been normalized to the strongest peak in each spectrum and the spectra are displayed with an offset for clarity. The negative bands between 1900 cm<sup>-1</sup> and 2200 cm<sup>-1</sup> observed in the spectra are due to imperfect background compensation due to the absorption of the diamond ATR crystal.
